# Supplementary material
Source: ML conference proceedings conference paper supplement (https://openreview.net/forum?id=9NHd6Z4aIi)
Supplement: supplementary_material [file supplementary.pdf › direct_models_supplementary/supplementary.pdf]

---

# Single-Step Diffusion via Direct Models

---

Anonymous Author(s)

Affiliation

Address

email

## 1 Comparison in the Case of Class-Conditioned Generation on ImageNet-256

Table 1: Comparison of different training objectives using the same model architecture (**DiT-B**). FID-50k scores (lower is better) are reported for 128-step, 4-step, and 1-step denoising. Direct Models achieves high-quality samples in a single step and training run, narrowing the gap with two-phase distillation methods. Parentheses indicate evaluations outside the method’s intended scope.

|                                         | ImageNet-256 (Class-Conditioned) |             |             |
|-----------------------------------------|----------------------------------|-------------|-------------|
|                                         | 128-Step                         | 4-Step      | 1-Step      |
| <i>Two-Phase Training</i>               |                                  |             |             |
| Progressive Distillation                | (201.9)                          | (142.5)     | <b>35.6</b> |
| Consistency Distillation                | 132.8                            | 98.01       | 136.5       |
| Reflow                                  | <b>16.9</b>                      | <b>32.8</b> | 44.8        |
| <i>End-to-End (Single Training Run)</i> |                                  |             |             |
| Diffusion                               | 39.7                             | (464.5)     | (467.2)     |
| Flow Matching                           | 17.3                             | (108.2)     | (324.8)     |
| Consistency Training                    | 42.8                             | 43.0        | 69.7        |
| Live Reflow (Ours)                      | 46.3                             | 95.8        | 58.1        |
| Shortcut Models                         | <b>15.5</b>                      | <b>28.3</b> | 40.3        |
| Direct Models (Ours)                    | -                                | -           | <b>36.5</b> |

Table 1 presents results for class-conditioned generation on ImageNet-256. Direct Models achieves competitive performance in the single-step generation setting, outperforming several end-to-end baselines and narrowing the gap with multi-phase approaches.

The only difference from the unconditional case is that we now aim to learn  $w_\nu(x_0, c, t)$ , where  $c$  is the class label used for conditioning.

The class-conditioned version of the progressive velocity propagation equation is:

$$w(x, c, t + \delta t) = \frac{t - \delta t}{t} \cdot w(x, c, t) + \frac{\delta t}{t} \cdot v(x_t, c, t) \quad (1)$$

This leads to the same training algorithm as in the unconditional case, with the addition of class conditioning.

Given an initial sample  $x_0 \sim \mu_0$ , the corresponding transformed sample  $x_1$  is obtained via a single forward pass:

$$x_1 = x_0 + w_\nu(x_0, c, 1). \quad (2)$$

**Classifier-Free Guidance** [1]. For the ImageNet case, we adopt classifier-free guidance (CFG) during training. A limitation of CFG in Direct Models is that the guidance scale must be chosen before training.

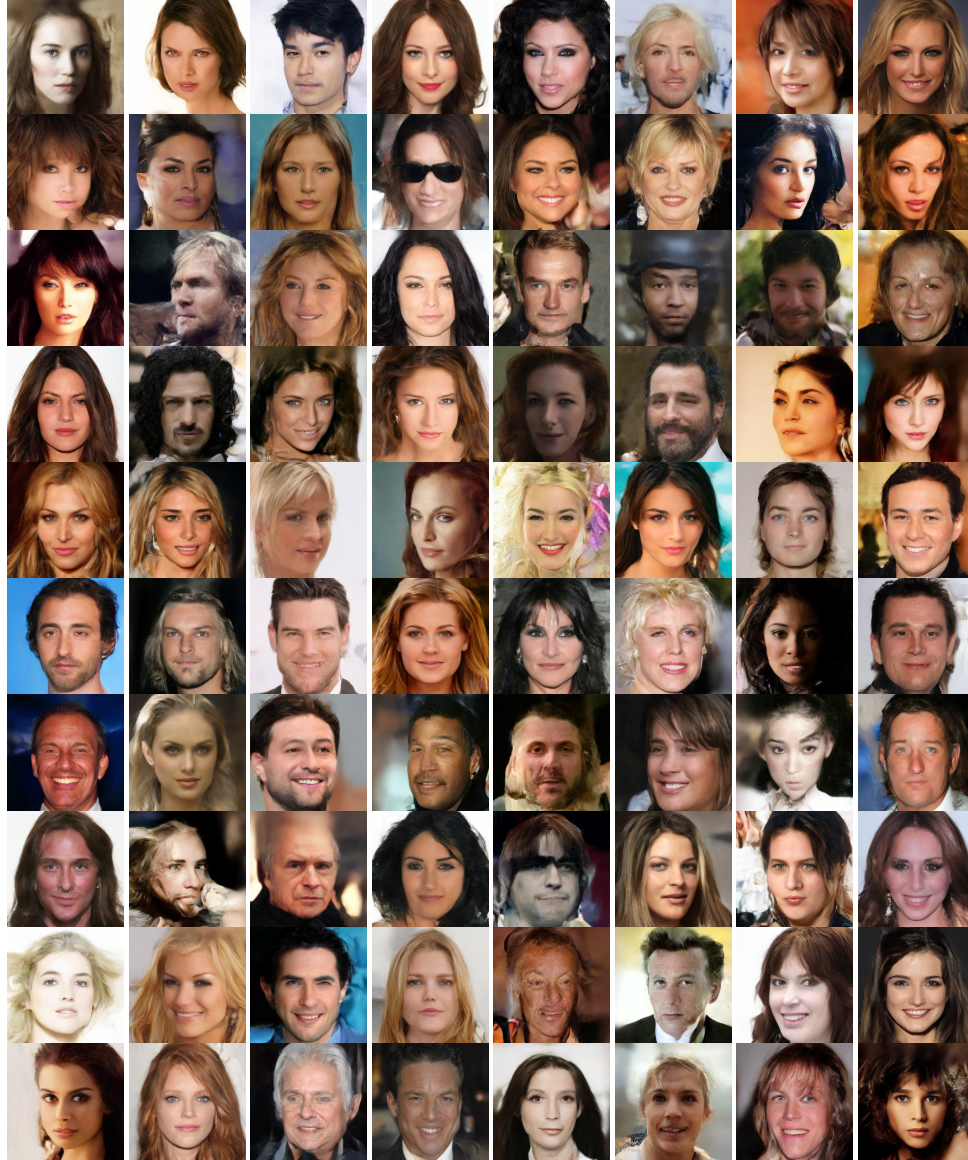

Figure 1: Representative examples generated unconditionally on the CelebA-HQ dataset at 256×256 resolution, using single-step generation with a DiT-B size model trained for 500,000 iterations.

## 2 Visual Results

Figures 1 and 2 show images generated by our method, trained on the unconditional CelebA-HQ and class-conditioned ImageNet datasets, respectively.

## 3 Training Details

Table 2 provides detailed training configurations corresponding to the results reported in Table 1 (main paper) and Table 1 (supplementary).

## References

- [1] Jonathan Ho and Tim Salimans. Classifier-free diffusion guidance. *arXiv preprint arXiv:2207.12598*, 2022. 1



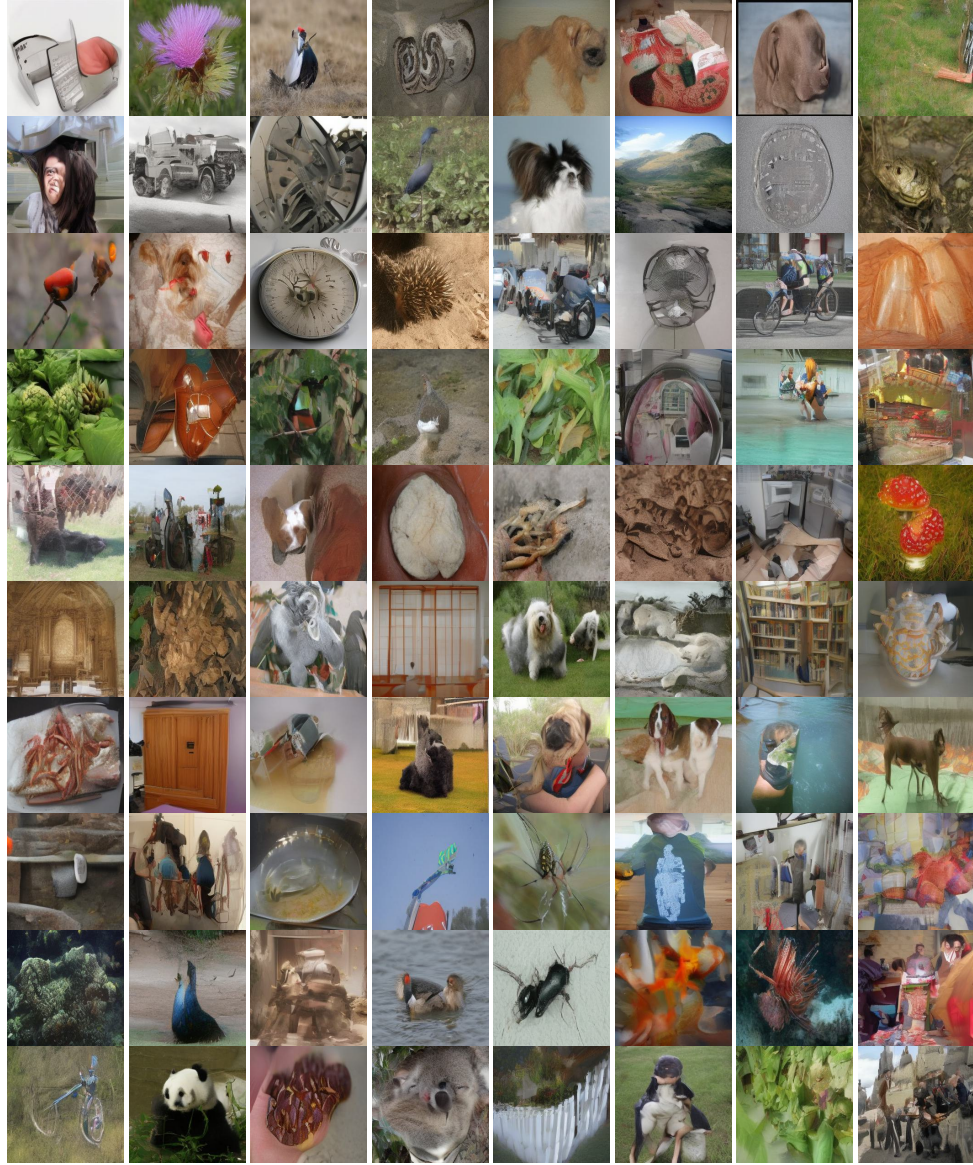

Figure 2: Representative examples generated unconditionally on the ImageNet dataset at  $256 \times 256$  resolution, using single-step generation with a DiT-B size model trained for 800,000 iterations.

|                                     |                                         |
|-------------------------------------|-----------------------------------------|
| Batch Size                          | 64 (CelebA-HQ), 256 (Imagenet)          |
| Training Steps                      | 500,000 (CelebA-HQ), 800,000 (Imagenet) |
| Latent Encoder                      | sd-vae-mse-ft                           |
| Latent Downsampling                 | 8 (256x256x3 to 32x32x4)                |
| Classifier Free Guidance            | 0 (CelebA-HQ), 1.5 (Imagenet)           |
| Class Dropout Probability           | 0 (CelebA-HQ), 0.1 (Imagenet)           |
| EMA Parameters Used For Evaluation? | Yes                                     |
| EMA Ratio                           | 0.999                                   |
| Optimizer                           | AdamW                                   |
| Learning Rate                       | 0.00005                                 |
| Weight Decay                        | 0.0                                     |
| Hidden Size                         | 768                                     |
| Patch Size                          | 2                                       |
| Number of Layers                    | 12                                      |
| Attention Heads                     | 12                                      |
| MLP Hidden Size Ratio               | 4                                       |
| $\delta t$                          | 0.01                                    |

Table 2: Hyperparameters used during training.
